# Supplementary material for: Graphene-based carbon coated tin oxide as a lithium ion battery anode material with high performance
Source: Royal Society of Chemistry journal article supplement (doi:10.1039/c7ta05256a), 2017-01-01
Supplement: c7ta05256a1.pdf [file c7ta05256a1.pdf]

*Supporting information*

# **Graphene-Based Carbon Coated Tin Oxide as Lithium Ion Battery Anode Material with High Performance**

Qiang Zhang, Qiuming Gao\*, Weiwei Qian, Hang Zhang, Yanli Tan, Weiqian Tian,

Zeyu Li and Hong Xiao

Key Laboratory of Bio-inspired Smart Interfacial Science and Technology of Ministry  
of Education, Beijing Key Laboratory of Bio-inspired Energy Materials and Devices,

School of Chemistry, Beihang University, Beijing 100191, P. R. China.

\*Corresponding author (Q.M. Gao, E-mail: [qmgao@buaa.edu.cn](mailto:qmgao@buaa.edu.cn))

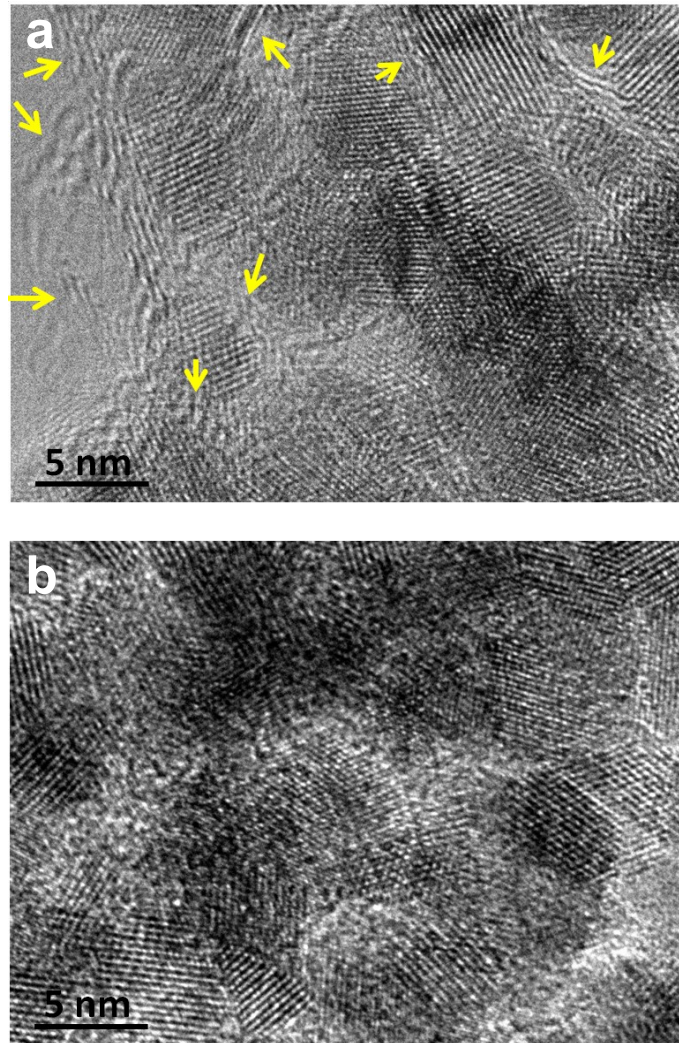

**Figure S1.** TEM images of rGO/PC/SnO<sub>2</sub> (a) and rGO/SnO<sub>2</sub> (b) samples, respectively. The carbon of rGO/PC/SnO<sub>2</sub> sample was indicated by the yellow arrows in (a). The interfaces between the crystallized SnO<sub>2</sub> particles of rGO/PC/SnO<sub>2</sub> (a) are filled with carbon, which can prevent the agglomeration of SnO<sub>2</sub> nanoparticles and limit their volume expansion during the circulation used as the LIB anode, thus greatly increasing the cyclic stability.

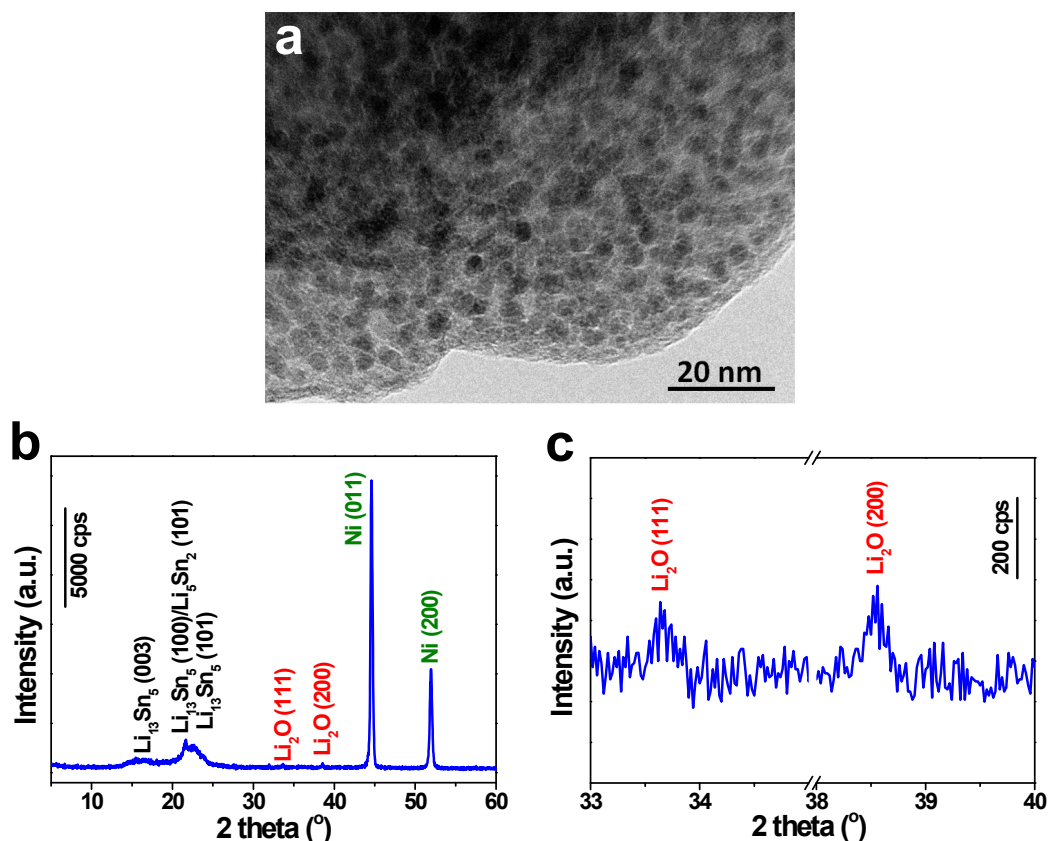

**Figure S2.** TEM image (a) and XRD patterns (b and c) of rGO/PC/SnO<sub>2</sub> electrode material measured after 150 cycles at 0.1 C. The Li<sub>x</sub>Sn alloy with the size of about 5-8 nm could be found (a). The typical XRD peaks of Li<sub>13</sub>Sn<sub>5</sub> (PDF#29-0838; Hexagonal, *P*-3m1 (164)) and Li<sub>5</sub>Sn<sub>2</sub> (PDF#29-0839; Hexagonal, *R*-3m (166)) could be observed (b). And the peaks corresponding to the (111) and (200) lattice planes of Li<sub>2</sub>O (PDF#12-0254; Cubic, *Fm*-3m (225)) could be found in the enlarged XRD patterns (c). The strong 2θ peaks located at 44.50° and 51.90° (b) are corresponding to the Ni (011) and (200) lattice planes, since the active material is coated on the nickel foam.

As to the SnO<sub>2</sub> based sample, two steps of electrochemical reactions occurred in the discharging process: (i) the SnO<sub>2</sub> irreversibly reduced to metallic Sn and Li<sub>2</sub>O and (ii) the reversible Li-Sn alloying reaction. The resultant small nanosized Li<sub>x</sub>Sn alloy including primary Li<sub>13</sub>Sn<sub>5</sub> and Li<sub>5</sub>Sn<sub>2</sub> is due to the coated carbon which can prevent the volume expansion and the detrimental aggregation of the Sn clusters, thereby ensuring that the electrode will not break and electrons and lithium ions can transport easily, thus leading to an excellent cyclic stability of the rGO/PC/SnO<sub>2</sub> electrode material when using as the LIB cathode.
